# Supplementary material
Source: PubMed Central journal article supplement (PMC283534)

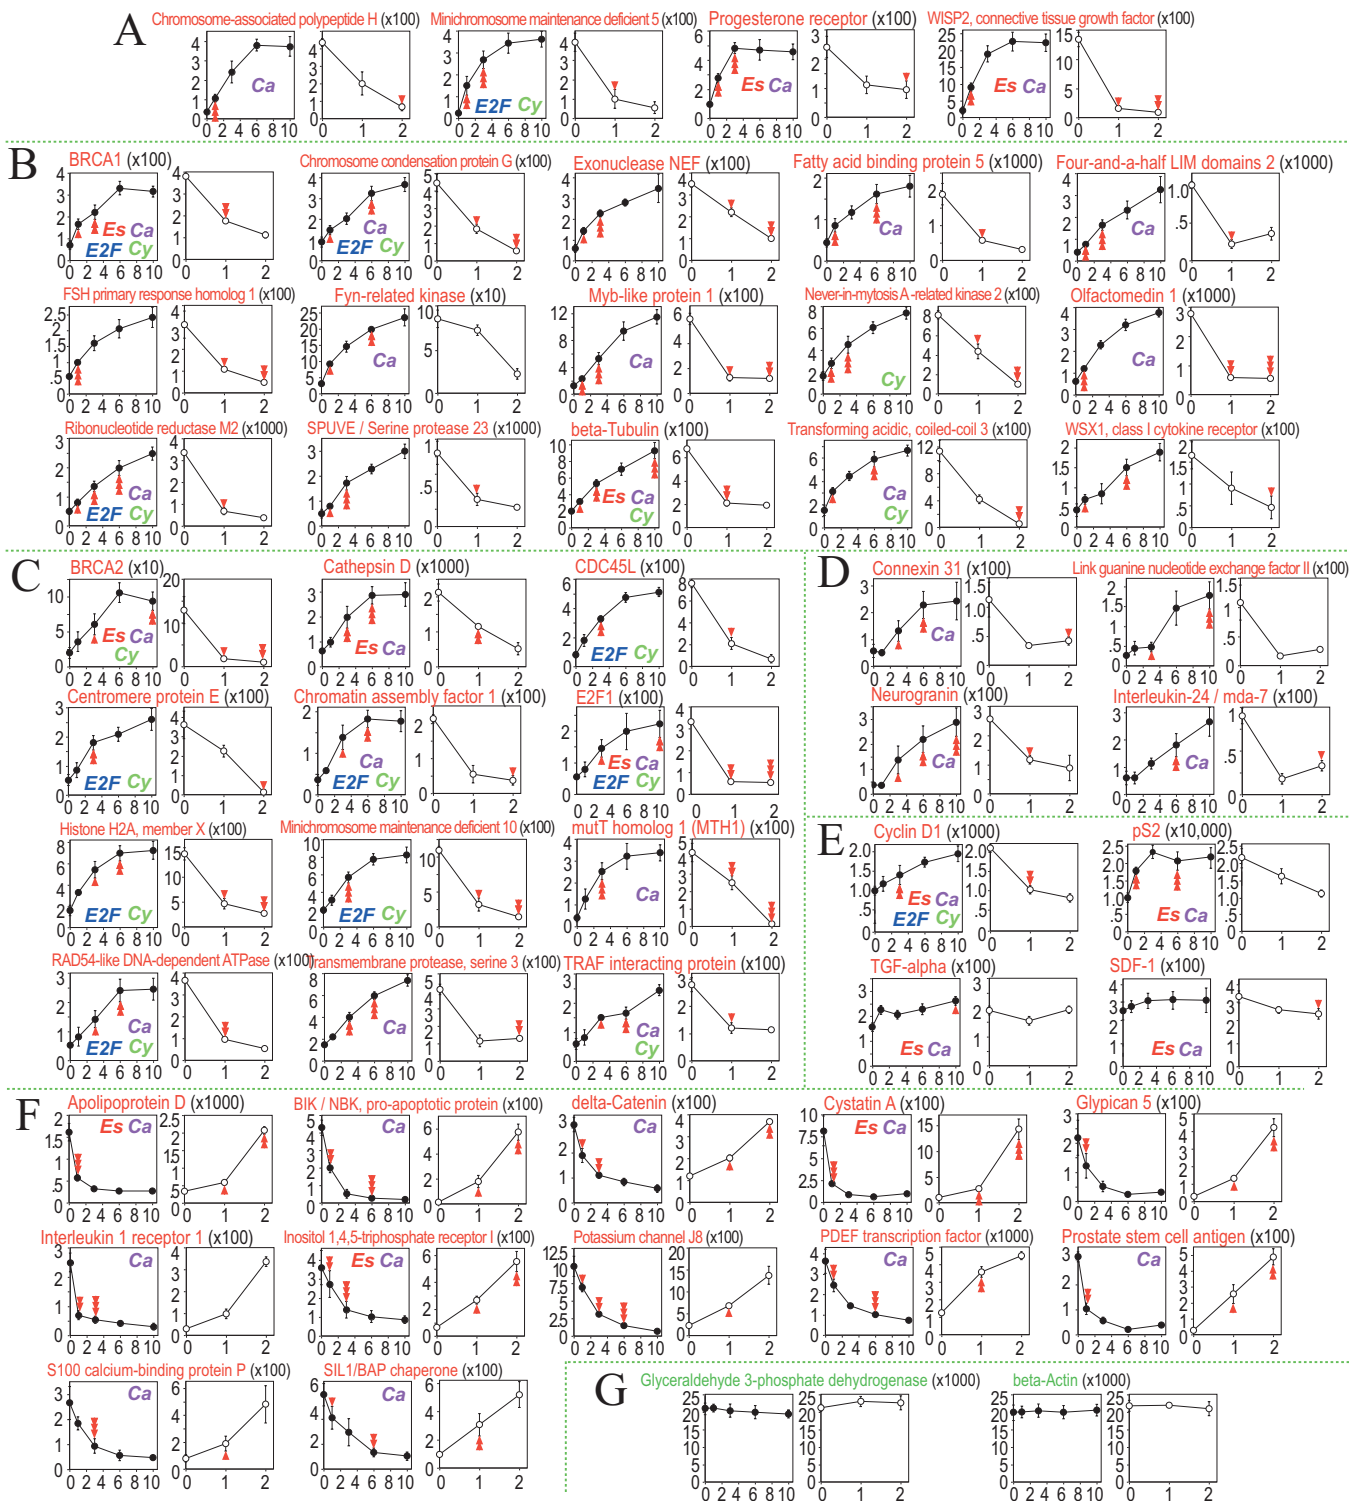

Supplement: pnas_100_24_13994__2.pdf [file pnas_100_24_13994__2.pdf]
